# Supplementary material for: Discriminatory Brain Processes of Native and Foreign Language in Children with and without Reading Difficulties
Source: MDPI journal article supplement (doi:10.3390/brainsci13010076), 2022-12-30
Supplement: s1 [file s1]

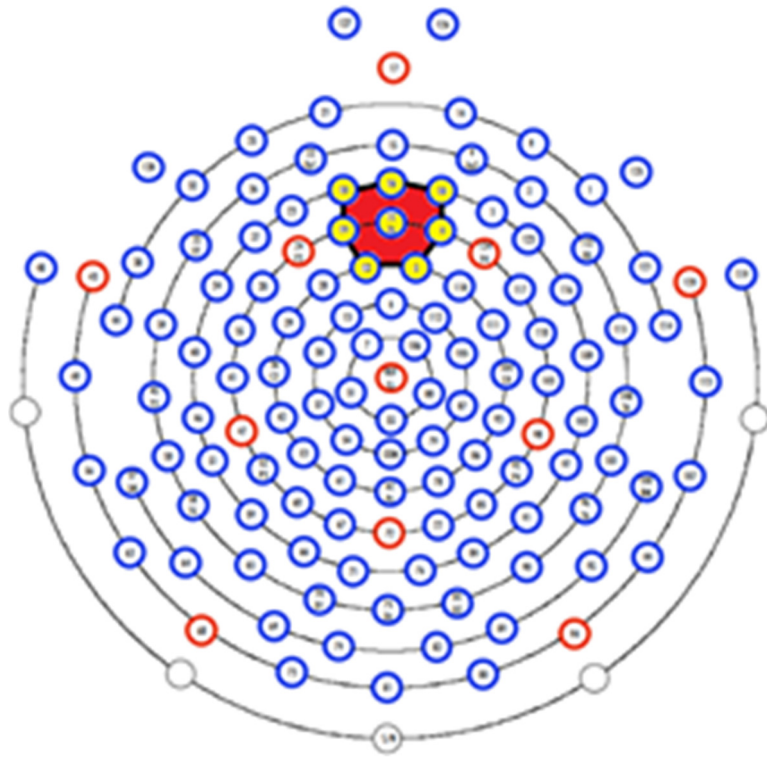

Figure S1: The electrodes selection (highlighted in yellow) and the region of interest for the ANOVA computations

Table S1: Number of accepted trials for each stimulus by group

| <i>CTR group</i> |                |                |            |            |                |                |            |            |
|------------------|----------------|----------------|------------|------------|----------------|----------------|------------|------------|
| Language         | Finnish        |                |            |            | English        |                |            |            |
|                  | Standards      |                | Deviants   |            | Standards      |                | Deviants   |            |
| Stimuli          | <i>suu</i>     | <i>suu</i>     | <i>sii</i> | <i>sai</i> | <i>shoe</i>    | <i>shoe</i>    | <i>she</i> | <i>shy</i> |
|                  | <i>pre-sii</i> | <i>pre-sai</i> |            |            | <i>pre-she</i> | <i>pre-shy</i> |            |            |
| Range            | [51–99]        | [51–99]        | [47–99]    | [43–100]   | [50–100]       | [50–98]        | [50–99]    | [50–99]    |
| <i>Mean</i>      | 82.52          | 83.12          | 83.01      | 85.65      | 81.24          | 81.47          | 82.23      | 82.04      |
| <i>SD</i>        | 12.21          | 11.26          | 12.24      | 12.26      | 10.92          | 11.59          | 10.84      | 12.22      |
| <i>RD group</i>  |                |                |            |            |                |                |            |            |
| Language         | Finnish        |                |            |            | English        |                |            |            |
|                  | Standards      |                | Deviants   |            | Standards      |                | Deviants   |            |
| Stimuli          | <i>suu</i>     | <i>suu</i>     | <i>sii</i> | <i>sai</i> | <i>shoe</i>    | <i>shoe</i>    | <i>she</i> | <i>shy</i> |
|                  | <i>pre-sii</i> | <i>pre-sai</i> |            |            | <i>pre-she</i> | <i>pre-shy</i> |            |            |
| Range            | [51–90]        | [44–92]        | [47–93]    | [52–93]    | [55–95]        | [50–91]        | [54–88]    | [45–88]    |
| <i>Mean</i>      | 76.30          | 76.15          | 75.84      | 76.73      | 75.19          | 74.07          | 74.03      | 73.96      |
| <i>SD</i>        | 11.24          | 11.74          | 12.89      | 11.18      | 9.66           | 10.35          | 9.34       | 10.61      |

Table S2A. Summary of the stimuli used in the oddball paradigm presented in two blocks (Finnish and English) with the detailed trial numbers used in the experiment, the total duration of each stimulus (ms), and the frequencies (Hz) before and after the transition point from the consonant to the vowel

| Stimuli                   | Total duration of the stimuli (ms) | Trial number in the paradigm | Formant transition time point (from consonant to vowel) (ms) | Frequency at the formant transition point (Hz) | Time (ms) | Max frequency before the transition point (Hz) | Time (ms) | Max frequency after the transition point (Hz) | Max Pitch |
|---------------------------|------------------------------------|------------------------------|--------------------------------------------------------------|------------------------------------------------|-----------|------------------------------------------------|-----------|-----------------------------------------------|-----------|
| Finnish stimuli (Block 1) |                                    |                              |                                                              |                                                |           |                                                |           |                                               |           |
| <i>suu</i>                | 401                                | 800                          | 119                                                          | 2,061                                          | 88        | 2,096                                          | 177       | 3,025                                         | 94.91     |
| <i>sai</i>                |                                    | 100                          | 119                                                          | 1,930                                          | 89        | 1,739                                          | 183       | 2,811                                         | 94.90     |
| <i>sii</i>                |                                    | 100                          | 119                                                          | 2,084                                          | 80        | 1,787                                          | 176       | 2,787                                         | 94.45     |
| English stimuli (Block 2) |                                    |                              |                                                              |                                                |           |                                                |           |                                               |           |
| <i>shoe</i>               | 401                                | 800                          | 120                                                          | 2,096                                          | 77        | 1,596                                          | 172       | 2,608                                         | 95.58     |
| <i>shy</i>                |                                    | 100                          | 121                                                          | 1,775                                          | 86        | 1,585                                          | 173       | 2,632                                         | 93.43     |
| <i>she</i>                |                                    | 100                          | 121                                                          | 1,763                                          | 88        | 1,537                                          | 163       | 2,473                                         | 94.05     |

Note: The time point of change in frequency of the formant for the vowel immediately after the consonant is indicated in the *Formant transition time point* column.

Table S2B. Euclidean distance within language stimuli vowels

| Finnish vowels following the /s/ sound |             |                |                |                        |                        |                                   |
|----------------------------------------|-------------|----------------|----------------|------------------------|------------------------|-----------------------------------|
| <i>Vowel</i>                           | <i>Type</i> | <i>F1 (Hz)</i> | <i>F2 (Hz)</i> | <i>F1 diff to [o:]</i> | <i>F2 diff to [o:]</i> | <i>Euclidean distance [o:] to</i> |
| [o:]                                   | std         | 392            | 1205           | -                      | -                      | -                                 |
| [i:]                                   | dev         | 311            | 2242           | 81                     | -1037                  | 1040                              |
| [ai]                                   | dev         | 573            | 1418           | -181                   | -213                   | 279                               |
| English vowels following the /ʃ/ sound |             |                |                |                        |                        |                                   |
| <i>Vowel</i>                           | <i>Type</i> | <i>F1 (Hz)</i> | <i>F2 (Hz)</i> | <i>F1 diff to [o:]</i> | <i>F2 diff to [o:]</i> | <i>Euclidean distance [o:] to</i> |
| [o:]                                   | std         | 351            | 1715           | -                      | -                      | -                                 |
| [i:]                                   | dev         | 309            | 2240           | 42                     | -525                   | 526                               |
| [ai]                                   | dev         | 586            | 1353           | -235                   | 362                    | 795                               |

Table S2C. Center of Gravity (COG) of the English [s] and Finnish [ʃ] fricatives within each stimulus

| <i>Fricative</i> | <i>Stimuli</i> | <i>COG</i> | <i>Difference std – dev</i> |
|------------------|----------------|------------|-----------------------------|
| [s]              | <i>suu</i>     | 6453       | -                           |
|                  | <i>sii</i>     | 7557       | -1104                       |
|                  | <i>sai</i>     | 6769       | 316                         |
| [ʃ]              | <i>shoe</i>    | 5545       | -                           |
|                  | <i>she</i>     | 5648       | -103                        |
|                  | <i>shy</i>     | 4953       | 592                         |

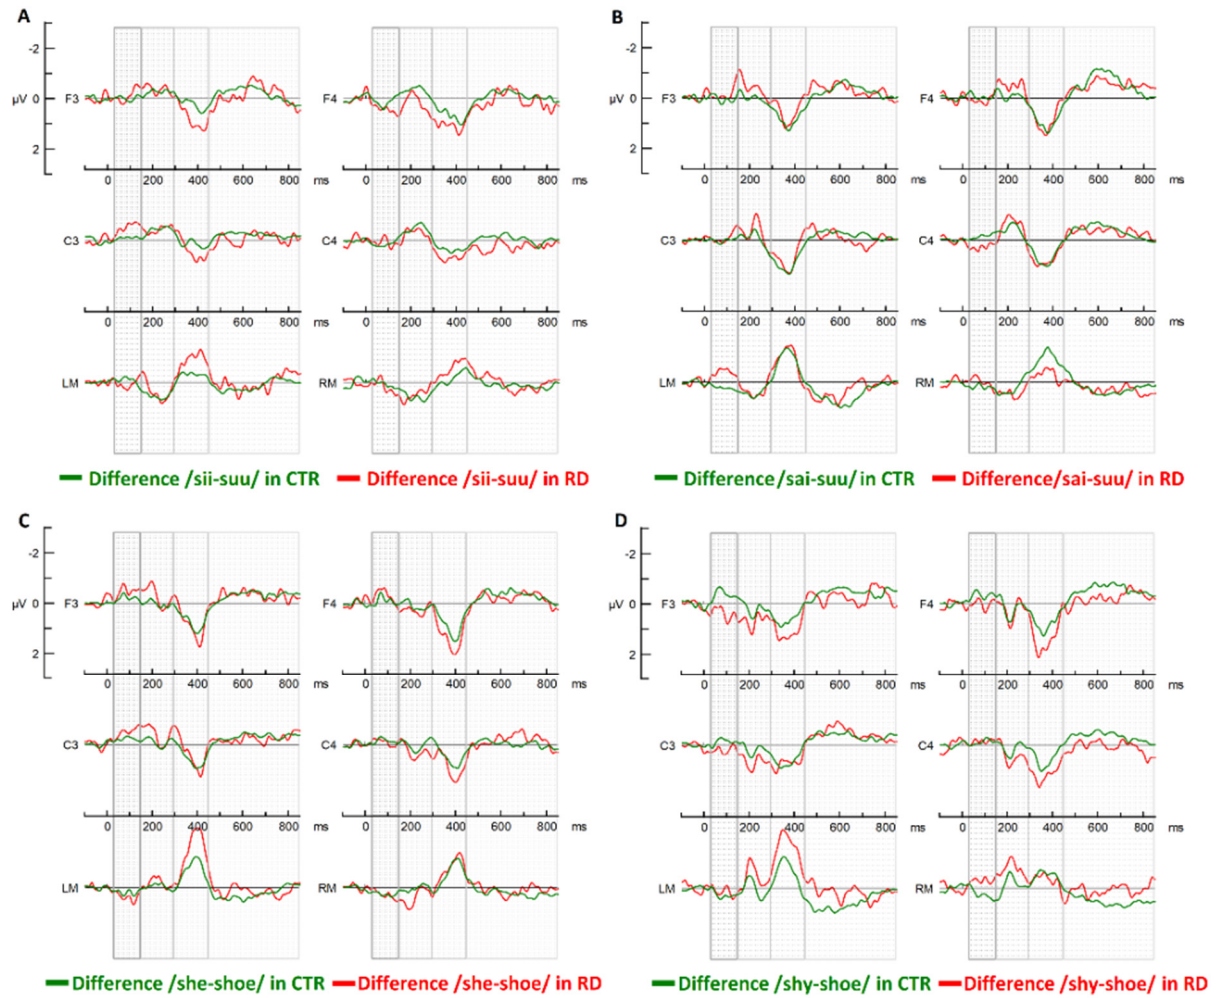

Figure S2. Group difference waveforms of the RD group (in red) vs the group difference waveforms of the CTR group (in green). (A) The difference waveforms in native *sii-suu* and (B) native *sai-suu*, (C) The difference waveforms in the foreign *she-shoe* and (D) in foreign *shy-shoe*.

Table S3. Summary of the ANOVA results

Condition

| <i>Condition</i> | <i>Standard (suu/shoe)</i>     | <i>Difference (sii/she)</i>    | <i>Difference (sai/shy)</i>     |
|------------------|--------------------------------|--------------------------------|---------------------------------|
| MMN (150–300 ms) | F(1,110) = 8.349<br>p = 0.005* | F(1,110) = 2.824<br>p = 0.096  | F(1,110) = 14.374<br>p = 0.000* |
| LDN (450–850 ms) | F(1,110) = 3.478<br>p = 0.650  | F(1,110) = 8.972<br>p = 0.003* | F(1,110) = 2.322<br>p = 0.130   |

(Condition \* Group)

| <i>Condition</i>   | <i>Standard (suu/shoe)</i>    | <i>Difference (sii/she)</i>   | <i>Difference (sai/shy)</i>   |
|--------------------|-------------------------------|-------------------------------|-------------------------------|
| <i>Time window</i> |                               |                               |                               |
| MMN (150–300 ms)   | F(1,110) = 0.606<br>p = 0.438 | F(1,110) = 3.145<br>p = 0.079 | F(1,110) = 1.768<br>p = 0.186 |
| LDN (450–850 ms)   | F(1,110) = 0.310<br>p = 0.860 | F(1,110) = 0.45<br>p = 0.833  | F(1,110) = 0.798<br>p = 0.374 |
